# Supplementary material for: Bioinspired hierarchical colloidal crystal paper with Janus wettability for oil/water separation and heavy metal ion removal
Source: Royal Society of Chemistry journal article supplement (doi:10.1039/d3nr02102e), 2023-01-01
Supplement: d3nr02102e1.pdf [file d3nr02102e1.pdf]

## Supplementary

### Bioinspired hierarchical colloidal crystals paper with Janus wettability for Oil/Water separation and heavy metal ion removal

Lihao Zhang <sup>a</sup>, Yufei Chen <sup>a</sup>, Yue Cao <sup>a</sup>, Sunlong Li <sup>a</sup>, Weipeng Lu <sup>a</sup>, Wei Cao <sup>a</sup>, Jialiang Zhu <sup>a</sup>, Weiting Bao <sup>a</sup>, Ming Shao <sup>a</sup>, Zhixing Gan <sup>a</sup>, Yunsong Di <sup>a</sup>, Fangjian Xing <sup>a</sup>, Xiang Li <sup>b</sup>, Liang Zhang <sup>b,\*</sup>, Cihui Liu <sup>a, b,\*</sup>

<sup>a</sup> Center for Future Optoelectronic Functional Materials, School of Computer and Electronic Information/School of Artificial Intelligence, Nanjing Normal University, Nanjing, China.

<sup>b</sup> State Grid Suzhou Power Supply Company, Suzhou, China

**Corresponding author.** Email address: cihui@njnu.edu.cn (Cihui Liu);

bioinspired@aliyun.com (Liang Zhang)

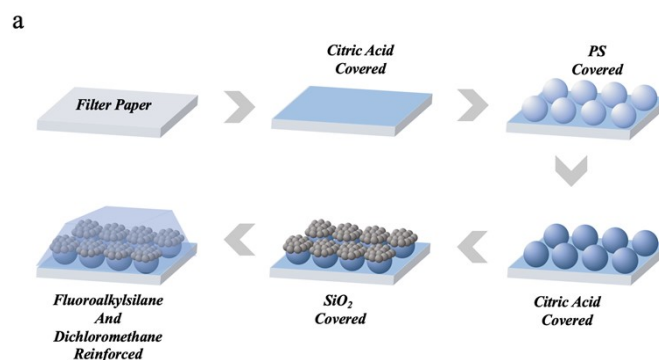

**Figure S1.** Schematic diagram of hierarchical structure preparation.

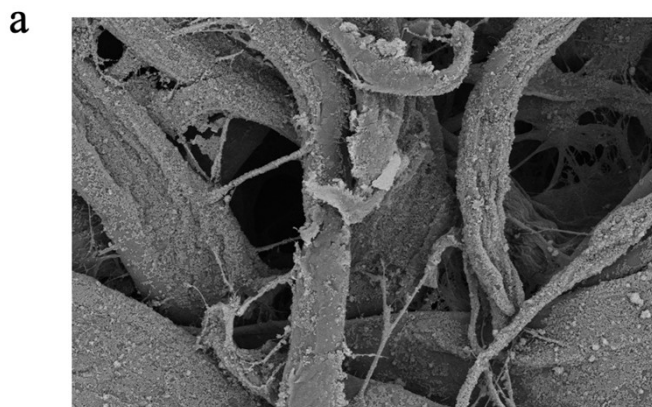

**Figure S2.** Image of filter paper assembled with graded colloidal crystals on the surface.

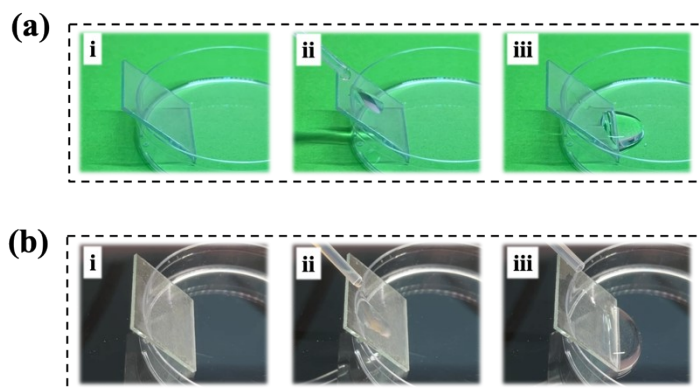

**Figure S3.** Experimental photographs of the effect of citric acid on substrate characterization with and without citric acid. (a) The SiO<sub>2</sub> and PS particles were not washed out when water was added dropwise to the slides with citric acid characterization; (b) the SiO<sub>2</sub> and PS particles were washed out when water was added dropwise to the slides without citric acid characterization.

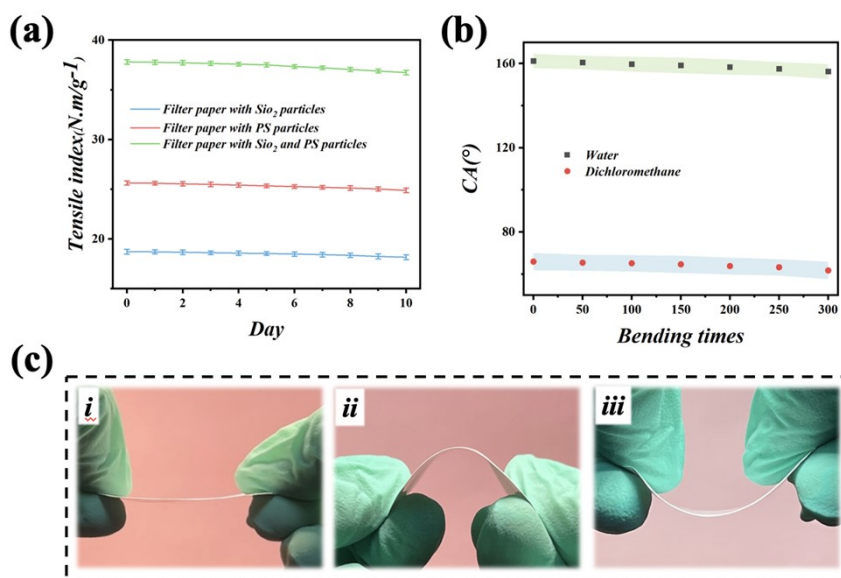

**Figure S4.** (a) Comparison of tensile index of filter paper with only SiO<sub>2</sub> particles, filter paper with only PS particles and filter paper with hierarchical structure. (b) Development of superhydrophobic filter paper regarding CA of water and

dichloromethane after experiencing different number of bends. (c) Photograph of the bending experiment.

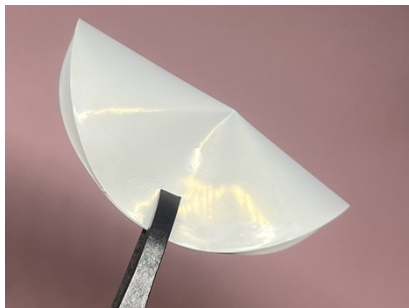

**Figure S5.** Photo of superhydrophobic filter paper placed for 300 days.  
per placed for 300 days.
